# Supplementary material for: Spurious proton transfer in hydrogen bonded dimers
Source: Royal Society of Chemistry journal article supplement (doi:10.1039/d4cp00907j), 2024-01-01
Supplement: d4cp00907j1.pdf [file d4cp00907j1.pdf]

# Spurious proton transfer in hydrogen bonded dimers

Joanatan Bautista-Renedo\* and Joel Ireta\*

*Departamento de Química, División de Ciencias Básicas e Ingeniería, Universidad  
Autónoma Metropolitana-Iztapalapa, Ciudad de México 09340, México.*

E-mail: joanatan\_br@xanum.uam.mx; iret@xanum.uam.mx

Table S1: Hydrogen bond strength,  $E_{\text{hb}}$  (in kcal/mol). Energies are basis set superposition error corrected

| System              | Method                  | aug-cc-PVYZ |       | System              | Method                  | aug-cc-PVYZ |       |
|---------------------|-------------------------|-------------|-------|---------------------|-------------------------|-------------|-------|
|                     |                         | Y = D       | Y = T |                     |                         | Y = D       | Y = T |
| (HCN) <sub>2</sub>  | PBE-D3                  | -4.77       | -4.82 | (HSiN) <sub>2</sub> | PBE-D3                  | pt          | pt    |
|                     | SCAN-D2                 | -5.05       | -5.13 |                     | SCAN-D2                 | pt          | -5.91 |
|                     | SCAN-L-D2               | -5.31       | -5.98 |                     | SCAN-L-D2               | pt          | pt    |
|                     | M06-L-D3                | -4.16       | -4.29 |                     | M06-L-D3                | -5.12       | -5.25 |
|                     | PBE0-D3                 | -4.94       | -4.97 |                     | PBE0-D3                 | -6.80       | -6.95 |
|                     | PBE0                    | -4.55       | -4.57 |                     | PBE0                    | -6.21       | -6.36 |
|                     | HSE03-D3                | -4.64       | -4.68 |                     | HSE03-D3                | -6.16       | -6.31 |
|                     | HSE03 <sub>NW</sub> -D3 | -4.75       | -4.80 |                     | HSE03 <sub>NW</sub> -D3 | -6.22       | -6.39 |
|                     | HSE06-D3                | -4.63       | -4.67 |                     | HSE06-D3                | -6.17       | -6.32 |
|                     | LC-PBE-D3               | -6.08       | -6.06 |                     | LC-PBE-D3               | -9.37       | -9.52 |
|                     | M06-2x-D3               | -4.45       | -4.52 |                     | M06-2x-D3               | -6.53       | -6.77 |
|                     | MP2                     | -4.46       | -4.70 |                     | MP2                     | -3.01       | -3.50 |
| (HGeN) <sub>2</sub> | PBE-D3                  | pt          | pt    | (HSnN) <sub>2</sub> | PBE-D3                  | pt          | pt    |
|                     | SCAN-D2                 | pt          | -6.22 |                     | SCAN-D2                 | pt          | pt    |
|                     | SCAN-L-D2               | pt          | pt    |                     | SCAN-L-D2               | pt          | pt    |
|                     | M06-L-D3                | -5.10       | -5.02 |                     | M06-L-D3                | pt          | pt    |
|                     | PBE0-D3                 | -6.59       | -6.65 |                     | PBE0-D3                 | pt          | pt    |
|                     | PBE0                    | -5.89       | -5.95 |                     | PBE0                    | pt          | pt    |
|                     | HSE03-D3                | -5.93       | -6.00 |                     | HSE03-D3                | pt          | pt    |
|                     | HSE03 <sub>NW</sub> -D3 | -6.07       | -6.15 |                     | HSE03 <sub>NW</sub> -D3 | pt          | pt    |
|                     | HSE06-D3                | -5.94       | -6.00 |                     | HSE06-D3                | pt          | pt    |
|                     | LC-PBE-D3               | -9.17       | -9.22 |                     | LC-PBE-D3               | pt          | pt    |
|                     | M06-2x-D3               | -6.12       | -6.41 |                     | M06-2x-D3               | -5.50       | -5.87 |
|                     | MP2                     | -2.77       |       |                     | MP2                     | -3.13       | -2.52 |

Basis set from "Basis Set Exchange" database. A New Basis Set Exchange: An Open, Up-to-date Resource for the Molecular Sciences Community. Benjamin P. Pritchard, Doaa Altarawy, Brett Didier, Tara D. Gibson, Theresa L. Windus. J. Chem. Inf. Model. 2019, 59(11), 4814-4820.

Table S2: Hydrogen bond distance,  $d_{\text{hb}}$  (in Å).

| System              | Method                  | aug-cc-PVYZ |       | System              | Method                  | aug-cc-PVYZ |       |
|---------------------|-------------------------|-------------|-------|---------------------|-------------------------|-------------|-------|
|                     |                         | Y = D       | Y = T |                     |                         | Y = D       | Y = T |
| (HCN) <sub>2</sub>  | PBE-D3                  | 2.15        | 2.18  | (HSiN) <sub>2</sub> | PBE-D3                  | pt          | pt    |
|                     | SCAN-D2                 | 2.15        | 2.18  |                     | SCAN-D2                 | pt          | 1.63  |
|                     | SCAN-L-D2               | 2.09        | 2.11  |                     | SCAN-L-D2               | pt          | pt    |
|                     | M06-L-D3                | 2.15        | 2.15  |                     | M06-L-D3                | 2.03        | 2.07  |
|                     | PBE0-D3                 | 2.15        | 2.18  |                     | PBE0-D3                 | 1.94        | 1.95  |
|                     | PBE0                    | 2.16        | 2.19  |                     | PBE0                    | 1.95        | 1.96  |
|                     | HSE03-D3                | 2.20        | 2.22  |                     | HSE03-D3                | 1.99        | 2.01  |
|                     | HSE03 <sub>NW</sub> -D3 | 2.18        | 2.21  |                     | HSE03 <sub>NW</sub> -D3 | 1.92        | 1.93  |
|                     | HSE06-D3                | 2.19        | 2.22  |                     | HSE06-D3                | 2.00        | 2.02  |
|                     | LC-PBE-D3               | 2.04        | 2.07  |                     | LC-PBE-D3               | 1.81        | 1.82  |
|                     | M06-2x-D3               | 2.20        | 2.22  |                     | M06-2x-D3               | 2.09        | 2.10  |
|                     | MP2                     | 2.18        | 2.19  |                     | MP2                     | 2.25        | 2.23  |
| (HGeN) <sub>2</sub> | PBE-D3                  | pt          | pt    | (HSnN) <sub>2</sub> | PBE-D3                  | pt          | pt    |
|                     | SCAN-D2                 | pt          | 1.57  |                     | SCAN-D2                 | pt          | pt    |
|                     | SCAN-L-D2               | pt          | pt    |                     | SCAN-L-D2               | pt          | pt    |
|                     | M06-L-D3                | 1.98        | 2.03  |                     | M06-L-D3                | pt          | pt    |
|                     | PBE0-D3                 | 1.90        | 1.91  |                     | PBE0-D3                 | pt          | pt    |
|                     | PBE0                    | 1.92        | 1.93  |                     | PBE0                    | pt          | pt    |
|                     | HSE03-D3                | 1.95        | 1.97  |                     | HSE03-D3                | pt          | pt    |
|                     | HSE03 <sub>NW</sub> -D3 | 1.83        | 1.85  |                     | HSE03 <sub>NW</sub> -D3 | pt          | pt    |
|                     | HSE06-D3                | 1.96        | 1.98  |                     | HSE06-D3                | pt          | pt    |
|                     | LC-PBE-D3               | 1.82        | 1.83  |                     | LC-PBE-D3               | pt          | pt    |
|                     | M06-2x-D3               | 2.12        | 2.11  |                     | M06-2x-D3               | 2.02        | 1.96  |
|                     | MP2                     | 2.15        |       |                     | MP2                     | 2.02        | 1.74  |

Basis set from "Basis Set Exchange" database.

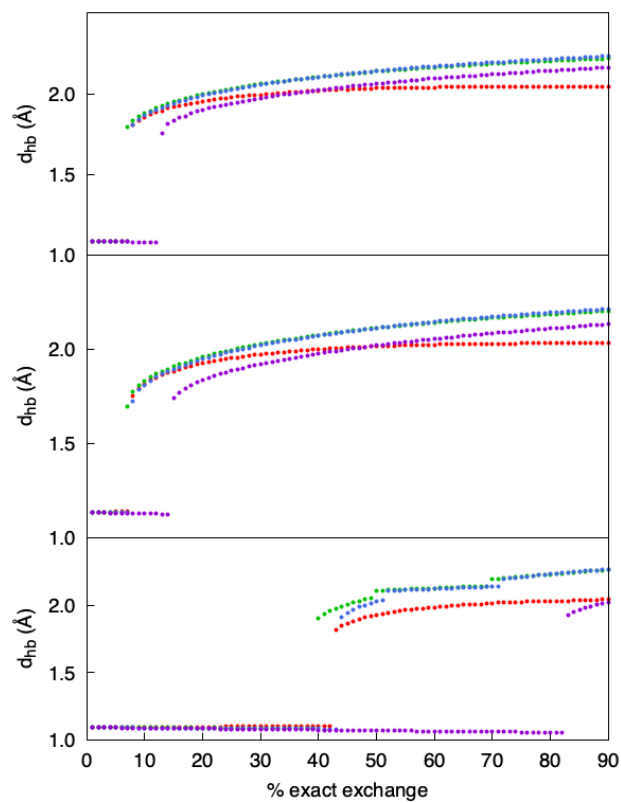

Figure S1: Change in the hydrogen bond distance,  $d_{\text{hb}}$ , with respect to the amount of exact exchange,  $\text{ex}$ , in m-PBE0 (red), m-HSE06 (green), m-HSE03 (blue) and m-HSE03<sub>NW</sub> (magenta) for (HSiN)<sub>2</sub> (top), (HGeN)<sub>2</sub> (middle) and (HSnN)<sub>2</sub> (bottom).

Table S3: Bond distance  $d_{X-H}$ , in Å, and deviation, in percentage, with respect to the MP2 value.

| System | Method     | % ex | $d_{X-H}$ | Deviation (%) |
|--------|------------|------|-----------|---------------|
| HCN    | PBE        | 0    | 1.076     | 0.7           |
|        | m-HSE06-D3 | 10   | 1.073     | 0.5           |
|        |            | 20   | 1.070     | 0.2           |
|        |            | 40   | 1.065     | -0.3          |
|        | MP2        | 100  | 1.068     | 0.0           |
| HSiN   | PBE        | 0    | 1.504     | 1.1           |
|        | m-HSE06-D3 | 10   | 1.497     | 0.6           |
|        |            | 20   | 1.491     | 0.2           |
|        |            | 40   | 1.479     | -0.6          |
|        | MP2        | 100  | 1.488     | 0.0           |
| HGeN   | PBE        | 0    | 1.538     | 1.3           |
|        | m-HSE06-D3 | 10   | 1.530     | 0.7           |
|        |            | 20   | 1.525     | 0.4           |
|        |            | 40   | 1.513     | -0.4          |
|        | MP2        | 100  | 1.519     | 0.0           |
| HSnN   | PBE        | 0    | 1.703     | 2.9           |
|        | m-HSE06-D3 | 10   | 1.695     | 2.4           |
|        |            | 20   | 1.688     | 2.0           |
|        |            | 40   | 1.676     | 1.3           |
|        | MP2        | 100  | 1.655     | 0.0           |

Table S4: X – H stretching frequency,  $\nu_{\text{X-H}}$  in  $\text{cm}^{-1}$ , and deviation, in percentage, with respect to the MP2 value.

| System | Method     | % ex | $\nu_{\text{X-H}}$ | Deviation (%) |
|--------|------------|------|--------------------|---------------|
| HCN    | PBE        | 0    | 3360.3             | -2.8          |
|        | m-HSE06-D3 | 10   | 3398.9             | -1.7          |
|        |            | 20   | 3435.9             | -0.6          |
|        |            | 40   | 3502.9             | 1.3           |
|        |            | MP2  | 100                | 3456.8        |
| HSiN   | PBE        | 0    | 2097.5             | -5.0          |
|        | m-HSE06-D3 | 10   | 2154.2             | -2.5          |
|        |            | 20   | 2189.1             | -0.9          |
|        |            | 40   | 2264.9             | 2.6           |
|        |            | MP2  | 100                | 2208.4        |
| HGeN   | PBE        | 0    | 2057.1             | -6.0          |
|        | m-HSE06-D3 | 10   | 2133.6             | -2.5          |
|        |            | 20   | 2166.4             | -1.0          |
|        |            | 40   | 2235.7             | 2.1           |
|        |            | MP2  | 100                | 2188.8        |
| HSnN   | PBE        | 0    | 1829.7             | -12.5         |
|        | m-HSE06-D3 | 10   | 1848.5             | -11.6         |
|        |            | 20   | 1895.3             | -9.4          |
|        |            | 40   | 1982.3             | -5.2          |
|        |            | MP2  | 100                | 2091.7        |

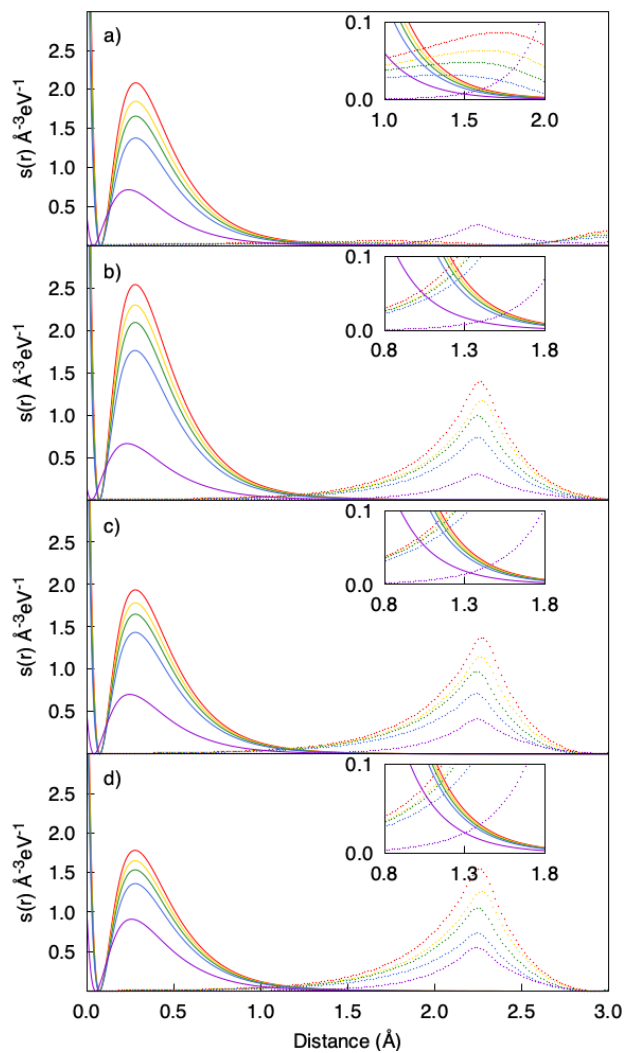

Figure S2: Local softness,  $s(\mathbf{r})^-$  (solid lines) and  $s(\mathbf{r})^+$  (dotted lines), of the HXN isolated molecules. Considering HXN oriented as in Fig. 3 of the main tex,  $s(\mathbf{r})^+$  is shifted to the right along along the  $d_{N...H}$  line. Red PBE calculations, yellow m-HSE06 with 10% of xc, green m-HSE06 with 20% of ex, blue m-HSE06 with 40% of ex, magenta MP2 calculations. a) HCN, b) HSiN, c) HGeN, d) HSnN.
